# Supplementary material for: Green construction of eco-friendly phosphotungstic acid Sr-MOF catalysts for crystal violet removal and synthesis of coumarin and xanthene compounds
Source: Royal Society of Chemistry journal article supplement (doi:10.1039/d1ra07160b), 2021-01-01
Supplement: d1ra07160b1.pdf [file d1ra07160b1.pdf]

## Supplementary Material

### Green construction of eco-friendly phosphotungstic acid Sr-MOF catalysts for crystal violet removal and synthesis of coumarin and xanthene compounds

Amr A. Ibrahim, Shaimaa L. Ali, Mina Shawky Adly, S.A. El-Hakam, S.E. Samra,  
Awad I. Ahmed\*

Chemistry Department, Faculty of Science, Mansoura University, Mansoura, Egypt

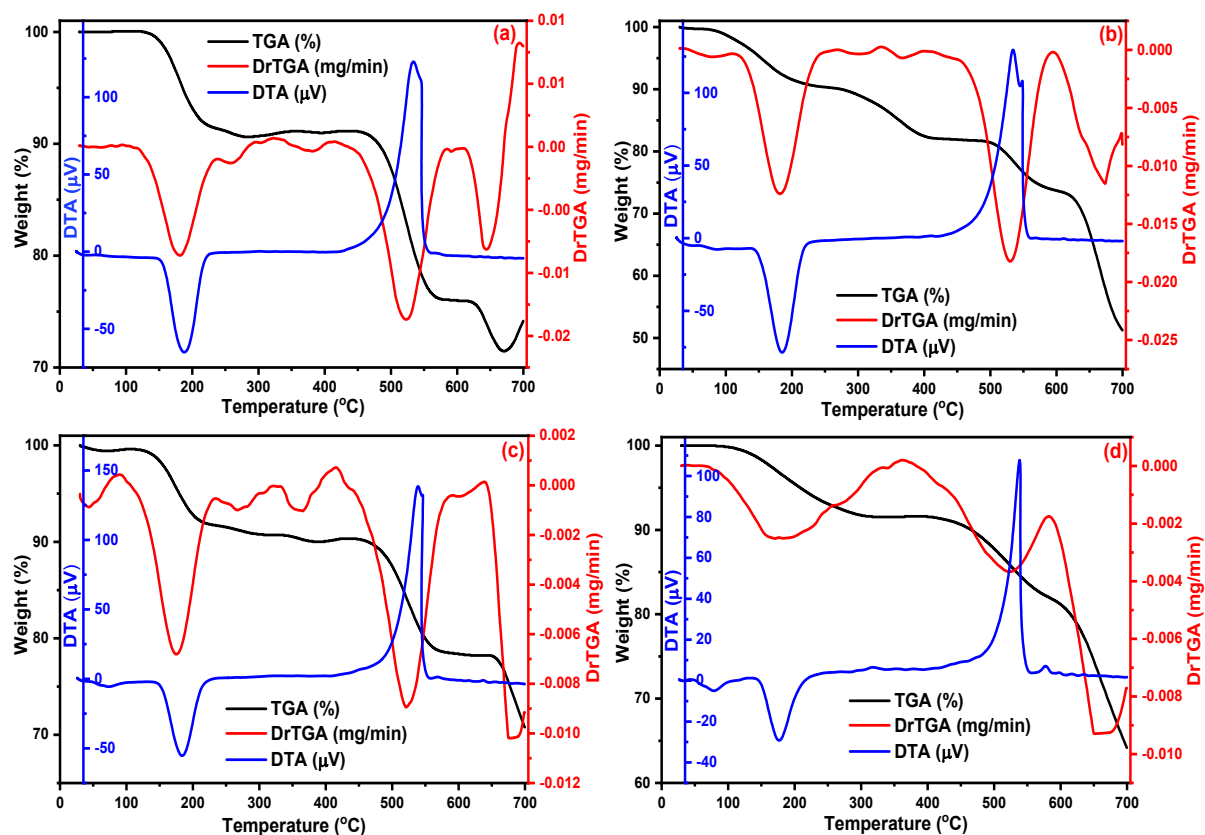

Fig. S1. Thermal analysis of (a) pure Sr-MOF, (b) 5, (c) 25 and (d) 55 wt% PWA/Sr-MOF.

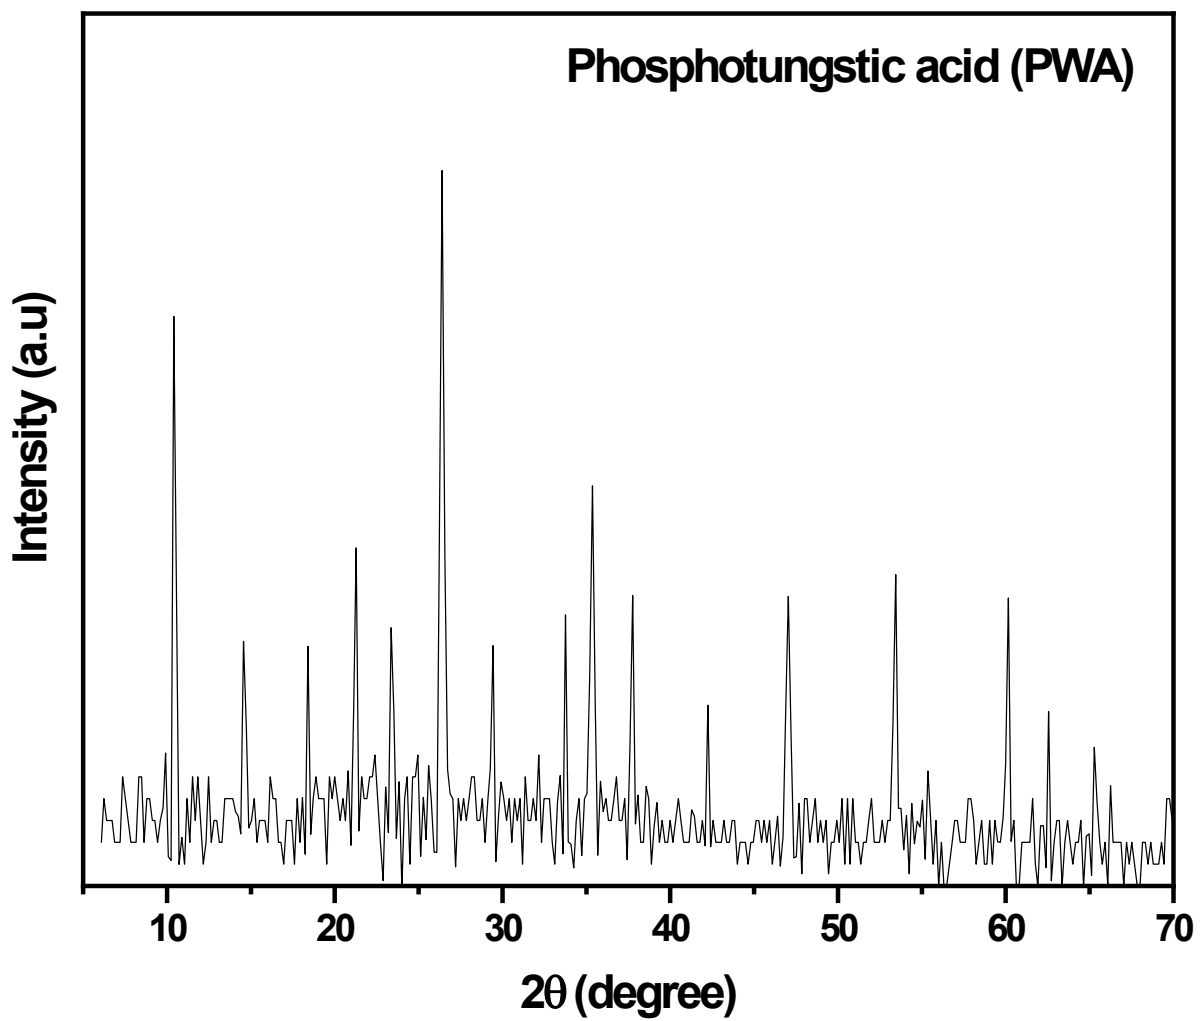

Fig. S2. XRD of pure phosphotungstic acid (PWA).

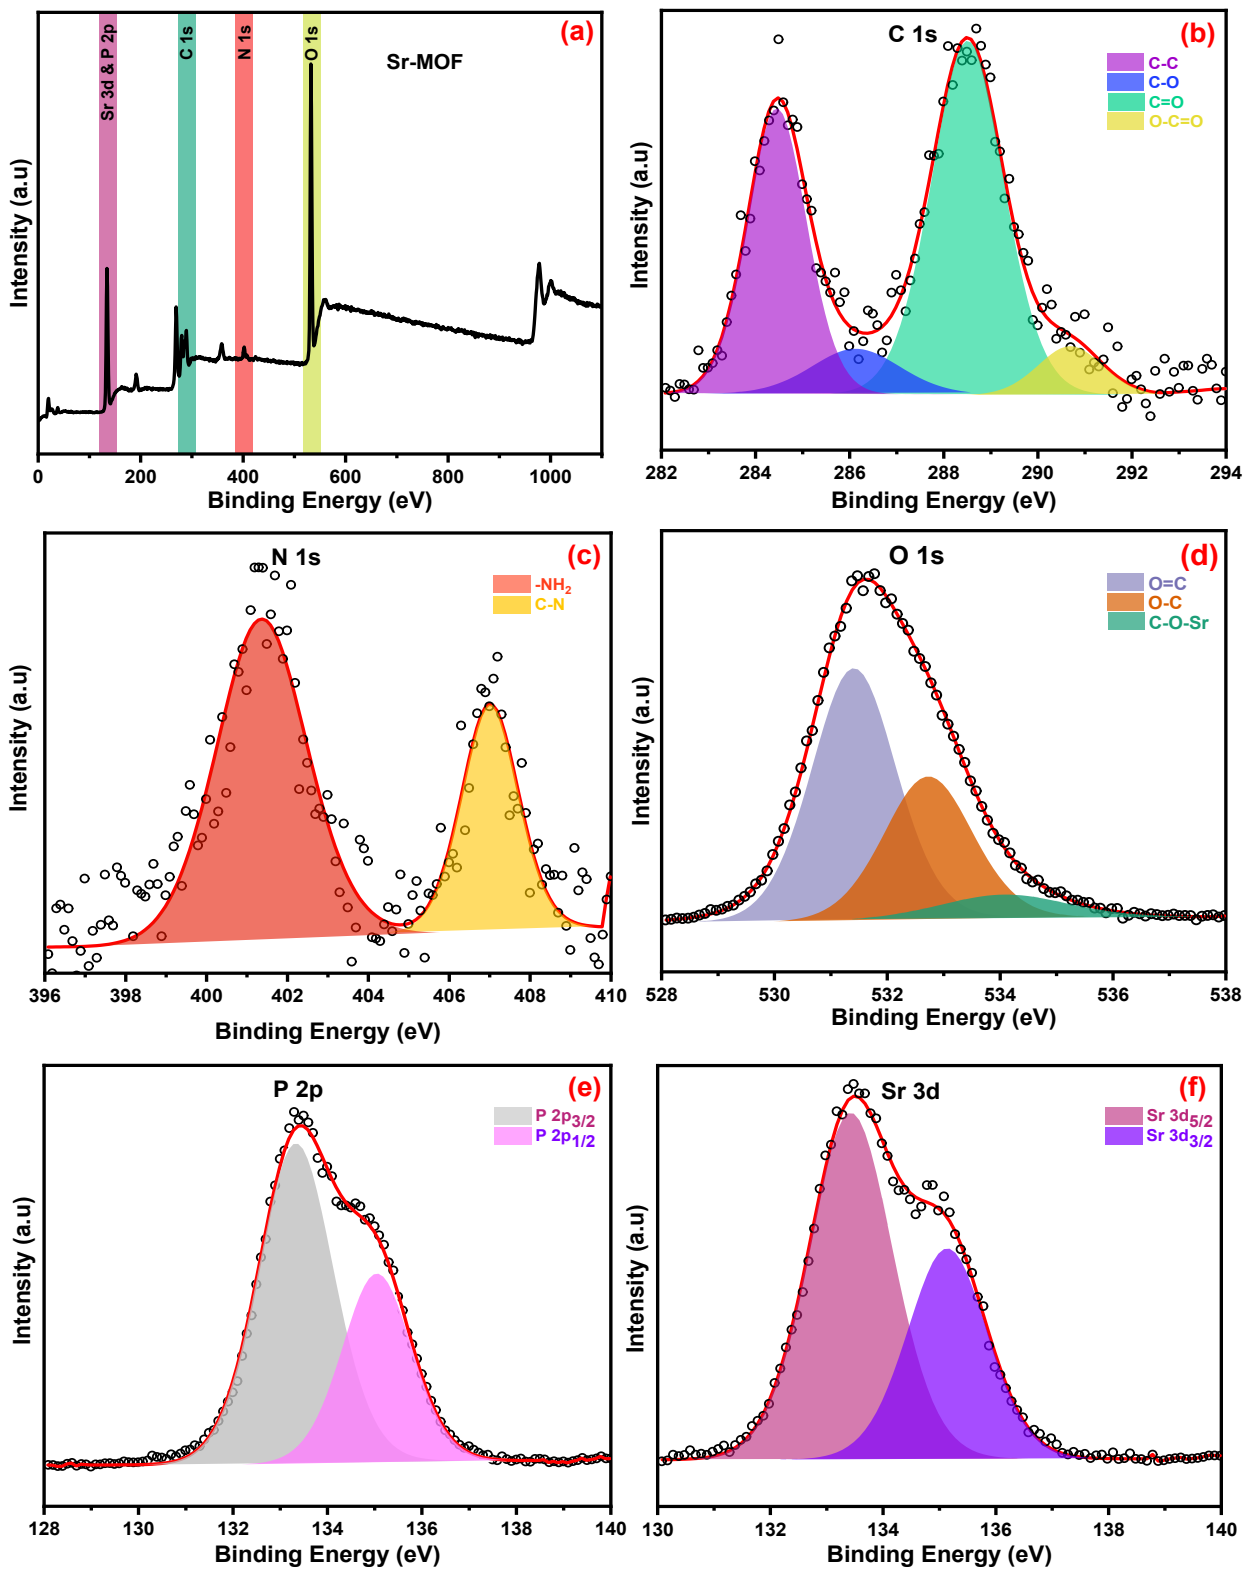

Fig. S3. XPS survey spectrum of Sr-MOF and high resolution XPS of (b) C 1s, (c) N 1s, (d) O 1s, (e) P 2p and (f) Sr 3d.

Table S1. Energy-dispersive X-ray spectroscopy analysis data of Sr-MOF.

| Major elements          | Weight%                                                           | Atomic% |
|-------------------------|-------------------------------------------------------------------|---------|
| C K                     | 13.95                                                             | 21.52   |
| N K                     | 7.93                                                              | 10.49   |
| O K                     | 50.82                                                             | 58.86   |
| P K                     | 8.70                                                              | 5.20    |
| Sr K                    | 18.60                                                             | 3.93    |
| Stoichiometry of Sr-MOF | $\text{Sr}_{2.5}\text{P}_1\text{C}_2\text{N}_{1.5}\text{O}_{6.5}$ |         |

Table S2. Energy-dispersive X-ray spectroscopy analysis data of 25 wt% PWA/Sr-MOF.

| Major elements                        | Weight%                                                                     | Atomic% |
|---------------------------------------|-----------------------------------------------------------------------------|---------|
| C K                                   | 10.51                                                                       | 18.67   |
| N K                                   | 7.97                                                                        | 12.14   |
| O K                                   | 44.81                                                                       | 59.79   |
| P K                                   | 5.77                                                                        | 3.98    |
| Sr K                                  | 14.31                                                                       | 3.49    |
| W L                                   | 16.65                                                                       | 1.93    |
| Stoichiometry of 25 wt%<br>PWA/Sr-MOF | $\text{Sr}_{2.5}\text{P}_{1.1}\text{C}_2\text{N}_{1.5}\text{O}_8\text{W}_3$ |         |

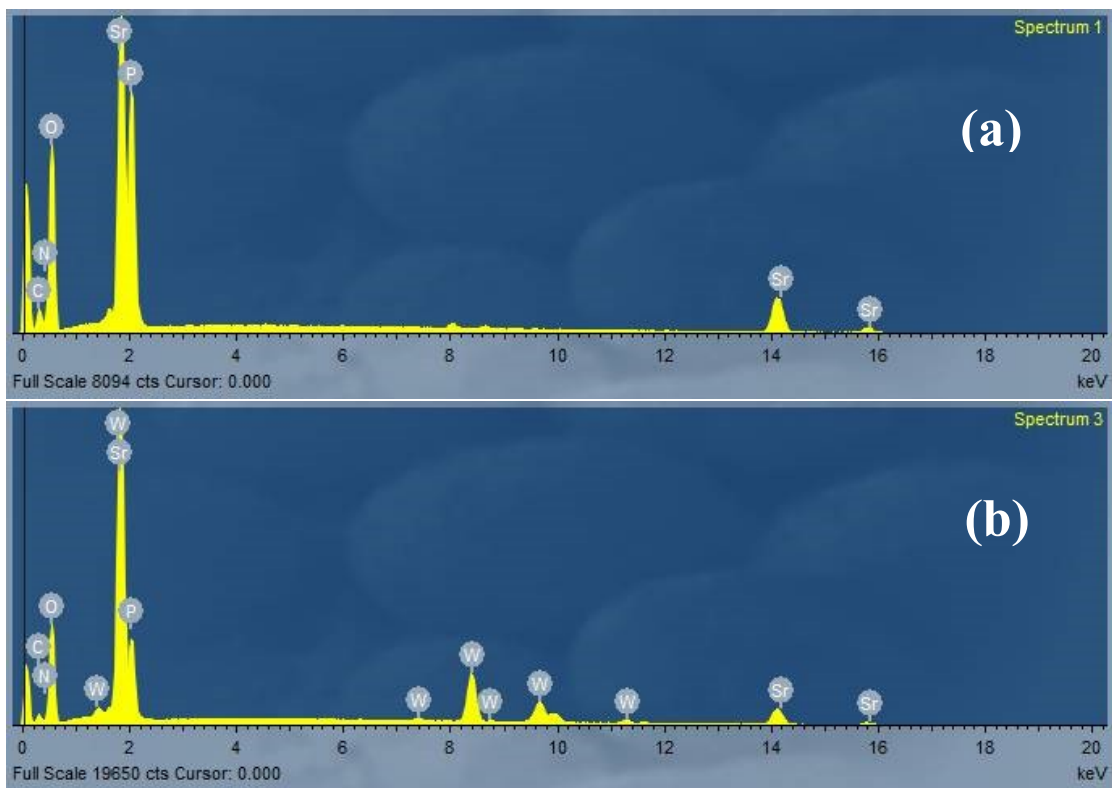

Fig. S4. Energy-dispersive X-ray spectroscopy of a) Sr-MOF and b) 25 wt% PWA/Sr-MOF.

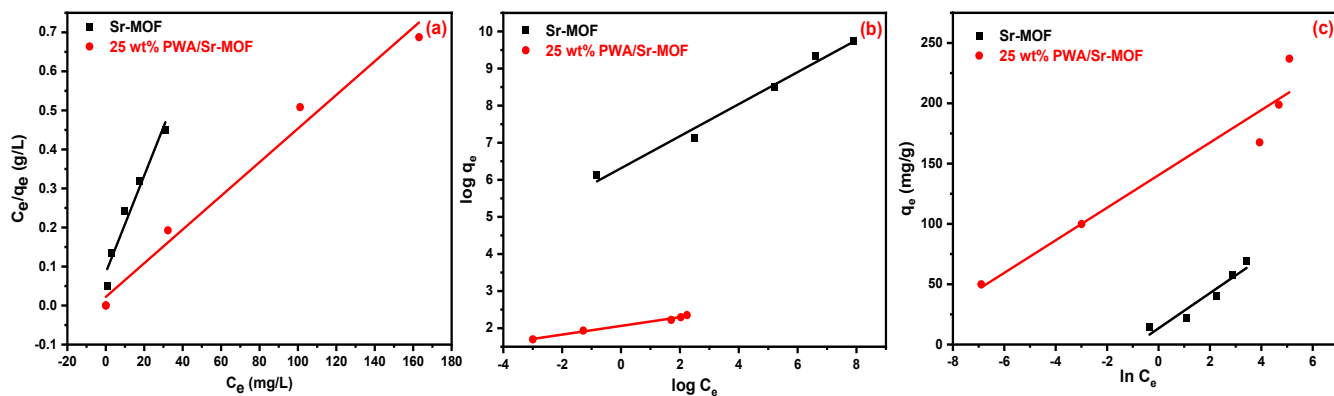

Fig. S5. Linear forms of (a) Langmuir, (b) Freundlich and (c) Temkin adsorption isotherms of CV dye using Sr-MOF and 25 wt% PWA/Sr-MOF adsorbents.

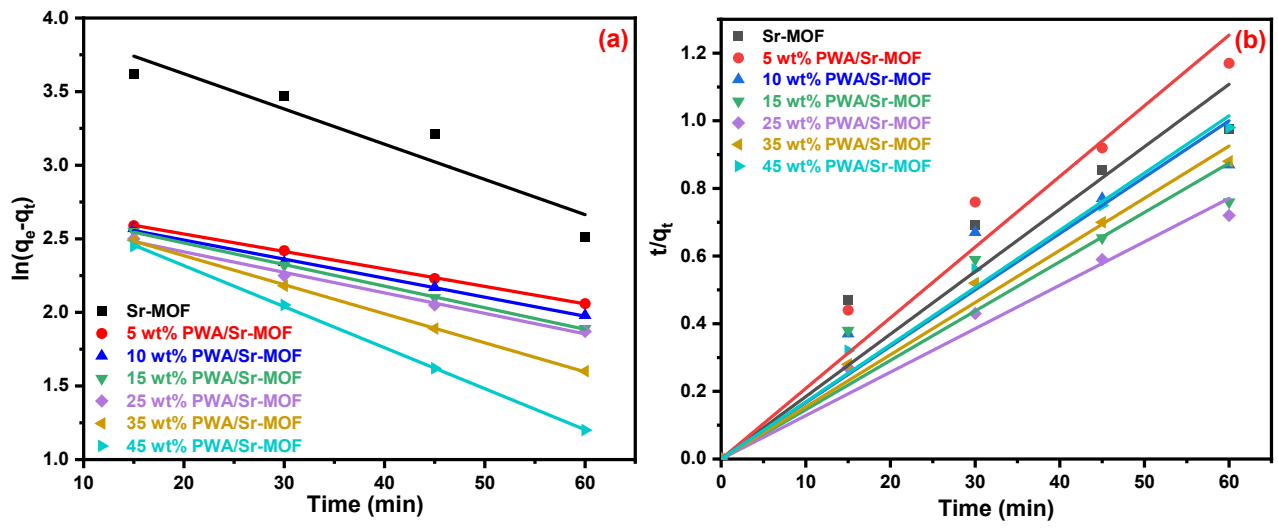

Fig. S6. (a) Pseudo-first order and (b) Pseudo-second order kinetics isotherms for CV dye adsorption on various wt% of PWA/Sr-MOF.

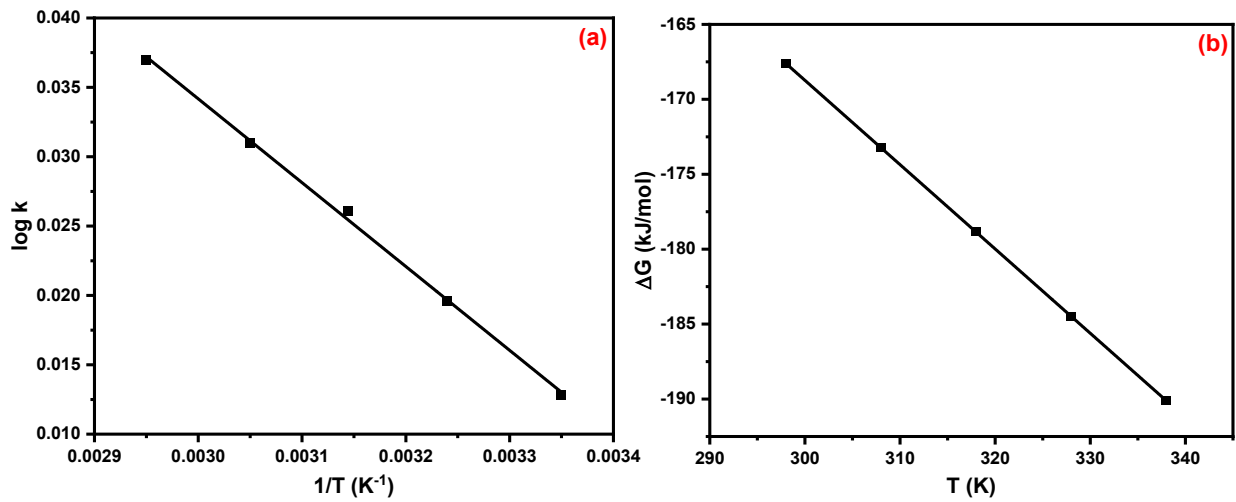

Fig. S7. Thermodynamic plots of (a)  $\log k$  versus  $1/T$  and (b) Gibbs free energy change ( $\Delta G^\circ$ ) versus temperature (K) of CV dye adsorption onto 25 wt% PWA-Sr-MOF.
